# Supplementary material
Source: Elsevier journal article supplement (https://www.sciencedirect.com/science/article/pii/S0120884521000663)
Supplement: mmc1 [file S0120884521000663:mmc1.doc]

Anexo 1.

| **Escala de Lysholm** | |
| --- | --- |
| Cojear (5 puntos)  Nada  Leve u ocasional  Severo y constantemente | 5  3  0 |
| Utiliza soporte para caminar (5 puntos)  No  Bastón o muletas  No puede apoyar | 5  2  0 |
| Se Bloquea la rodilla ( ó se Traba ) (15 puntos)  No sensaciones de bloqueo ni chasquido (traquido)  Sensación de chasquido(traquido) pero no bloqueo  Bloqueo  Ocasionalmente  Frecuentemente  Articulación bloqueada en el examen | 15  10  6  2  0 |
| Presenta Inestabilidad (Le Falsea la rodilla) (25 puntos)  Nunca al dar un paso  Raramente durante actividades atléticas u otro esfuerzo severo  Frecuentemente durante actividades atléticas u otro esfuerzo severo (o incapaz de participación)  Ocasionalmente en actividades diarias  A menudo en actividades diarias  En cada paso | 25  20  15  10  5  0 |
| Presenta Dolor (25 puntos)  No  Inconstante y leve durante el esfuerzo severo  Marcada durante esfuerzo severo  Marcado durante o después de caminar más de 2 km (20 cuadras)  Marcado durante o después de caminar menos de 2 km (20 cuadras)  Constante | 25  20  15  10  5  0 |
| No presenta Inflamación (10 puntos)  No  Durante esfuerzo severo  Durante esfuerzo diario  Constante | 10  6  2  0 |
| Puede Subir escaleras (10 puntos)  Sin problemas  Con leve dificultad  Un paso a la vez  Imposible | 10  6  2  0 |
| Es Capaz de colocarse en Cuclillas (Agacharse) (5 puntos)  Sin problemas  Con leve dificultad  No más allá de 90 grados  imposible | 5  4  2  0 |

| **Puntuación** | **Resultado** |
| --- | --- |
| 95 – 100 | Excelente |
| 84 – 94 | Bueno |
| 65-83 | Regular |
| < 65 | Pobre |
